# Supplementary material
Source: ML conference proceedings conference paper supplement (https://openaccess.thecvf.com/content/ICCV2023/html/Zhang_QD-BEV__Quantization-aware_ICCV_2023_paper.html)
Supplement: Supplementary file 1 [file Zhang_QD-BEV__Quantization-aware_ICCV_2023_supplemental.zip]

Archive with 2 entries (2 files):
- 09416-supp.mp4
- 09416-supp.pdf
